# Supplementary material for: Genetic variations on 31 and 450 residues of influenza A nucleoprotein affect viral replication and translation
Source: PubMed Central journal article supplement (PMC6943894; doi:10.1186/s12929-019-0612-z), 2020-01-06

Additional file 1.

# Epidemiology of H3N2 viruses

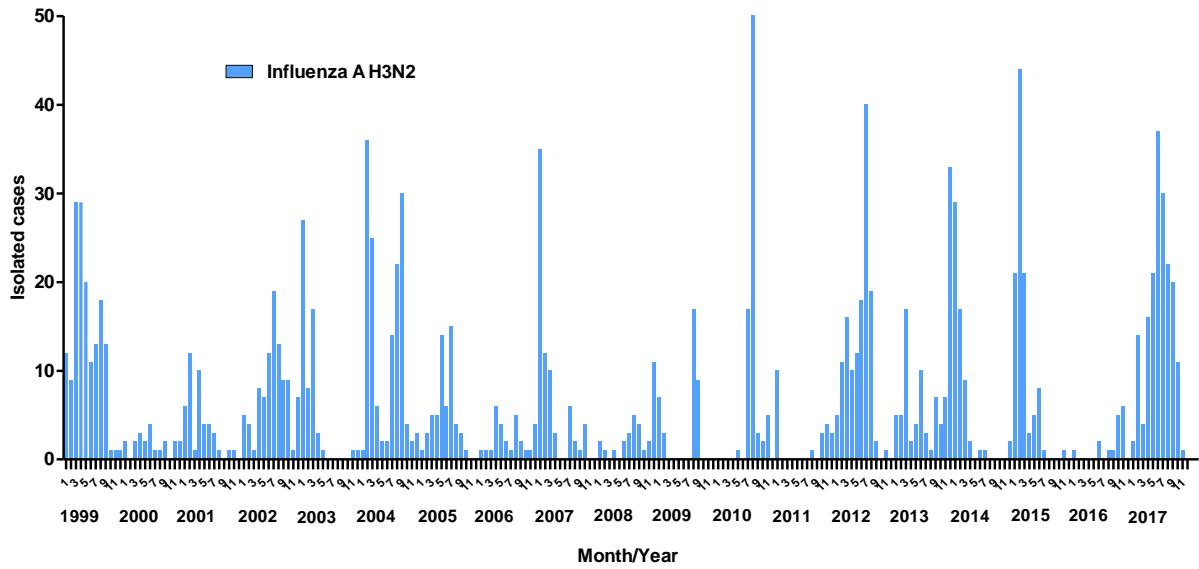

Supplement: 12929_2019_612_MOESM1_ESM.pdf [file 12929_2019_612_MOESM1_ESM.pdf]
