# Supplementary material for: Genetic variations on 31 and 450 residues of influenza A nucleoprotein affect viral replication and translation
Source: PubMed Central journal article supplement (PMC6943894; doi:10.1186/s12929-019-0612-z), 2020-01-06
Supplement: 12929_2019_612_MOESM2_ESM.pdf [file 12929_2019_612_MOESM2_ESM.pdf]

# Additional file 2. Amino acid substitutions in NP protein of H3N2 viruses

|                                 | NP amino acid position |    |    |    |    |    |    |    |    |    |    |     |     |     |     |     |     |     |     |     |     |     |     |     |     |     |     |     |     |     |     |     |     |     |     |     |     |     |     |     |     |     |     |     |     |     |     |     |     |     |     |     |     |     |     |     |     |   |   |   |   |   |   |   |   |   |   |   |   |   |   |   |   |
|---------------------------------|------------------------|----|----|----|----|----|----|----|----|----|----|-----|-----|-----|-----|-----|-----|-----|-----|-----|-----|-----|-----|-----|-----|-----|-----|-----|-----|-----|-----|-----|-----|-----|-----|-----|-----|-----|-----|-----|-----|-----|-----|-----|-----|-----|-----|-----|-----|-----|-----|-----|-----|-----|-----|-----|-----|---|---|---|---|---|---|---|---|---|---|---|---|---|---|---|---|
|                                 | 18                     | 27 | 31 | 50 | 52 | 65 | 77 | 81 | 85 | 95 | 98 | 101 | 103 | 114 | 127 | 128 | 131 | 136 | 146 | 186 | 197 | 217 | 239 | 280 | 286 | 287 | 301 | 312 | 334 | 343 | 350 | 353 | 354 | 360 | 363 | 371 | 373 | 375 | 377 | 384 | 396 | 400 | 406 | 411 | 417 | 421 | 423 | 425 | 430 | 450 | 452 | 456 | 459 | 472 | 480 | 481 | 482 |   |   |   |   |   |   |   |   |   |   |   |   |   |   |   |   |
| Hong Kong/1/68                  | E                      | A  | K  | S  | Y  | R  | K  | E  | A  | P  | K  | D   | K   | E   | D   | D   | A   | M   | T   | V   | I   | S   | M   | V   | A   | S   | I   | V   | N   | V   | T   | S   | P   | T   | V   | M   | A   | E   | S   | R   | T   | R   | I   | A   | N   | D   | P   | I   | T   | G   | K   | M   | Q   | A   | D   | M   | S   |   |   |   |   |   |   |   |   |   |   |   |   |   |   |   |   |
| Udorn/72                        |                        |    |    |    |    | R  |    |    |    |    |    |     |     |     |     |     |     |     |     |     | G   |     |     |     |     |     |     |     |     | L   |     |     |     |     |     |     |     | T   |     |     |     |     |     |     |     | S   |     |     |     |     | V   | R   | T   |     |     |     |     |   |   |   |   |   |   |   |   |   |   |   |   |   |   |   |   |
| Sydney/5/97                     | D                      |    |    |    |    | K  | R  |    |    |    | R  | R   | E   |     |     |     |     |     |     |     | I   | V   | V   | S   |     |     |     |     | H   | L   |     |     |     |     |     |     |     |     |     | N   | G   | G   |     |     | T   | E   | S   | V   |     |     | V   | R   | T   |     |     |     |     |   |   |   |   |   |   |   |   |   |   |   |   |   |   |   |   |
| Moscow/10/99                    | D                      |    | N  |    |    | K  |    |    |    |    | R  |     | E   |     |     |     |     |     |     |     | A   | I   | V   | V   | S   |     |     |     | H   | L   |     |     |     |     |     |     |     |     |     | N   | G   | G   |     |     | T   | E   | S   | V   |     |     | V   | R   | T   |     |     |     |     |   |   |   |   |   |   |   |   |   |   |   |   |   |   |   |   |
| Fujian/411/02                   | D                      |    |    |    |    | K  |    |    |    |    | R  |     | E   |     |     |     |     |     |     |     | I   | A   | I   | V   | V   | S   |     |     |     | H   | L   |     |     |     |     |     |     |     |     | N   | G   | G   |     |     | T   | T   | E   | S   |     |     | V   | R   | T   |     |     |     |     |   |   |   |   |   |   |   |   |   |   |   |   |   |   |   |   |
| California/7/04                 | D                      |    |    |    | H  | K  |    |    |    |    | R  |     | E   |     |     |     |     |     |     |     | I   | A   | I   | V   | V   | A   | S   |     |     |     | I   | H   | L   | K   |     |     |     |     |     |     | N   | G   | G   |     |     | T   | T   | E   | S   |     |     | V   | R   |     |     |     |     |   |   |   |   |   |   |   |   |   |   |   |   |   |   |   |   |
| Wisconsin/67/05                 | D                      |    |    |    |    | K  |    |    |    |    | R  |     | E   |     |     |     |     |     |     |     | I   | A   | I   | V   | V   | S   |     |     |     | H   | L   |     |     |     |     |     |     |     |     |     | N   | G   | G   | G   |     |     | T   | T   | E   | S   |     |     | V   | R   | T   |     |     |   |   |   |   |   |   |   |   |   |   |   |   |   |   |   |   |
| Brisbane/10/07                  | D                      |    |    |    | H  | K  |    |    |    |    | R  |     | E   |     |     |     |     |     |     |     | S   | I   | A   | I   | V   | V   | A   | S   |     |     |     | I   | H   | L   |     |     |     |     |     |     |     | N   | G   | G   |     |     | T   | T   | E   | S   |     |     | V   | R   | T   |     |     |   |   |   |   |   |   |   |   |   |   |   |   |   |   |   |   |
| Perth/16/09                     | D                      |    |    |    | H  | K  |    |    |    |    | R  |     | E   |     |     |     |     |     |     |     | S   | I   | A   | I   | V   | V   | A   | S   |     |     |     | I   | H   | L   |     |     |     |     |     |     |     | N   | G   | G   |     |     | T   | T   | E   | S   |     | S   | V   | R   | T   |     |     |   |   |   |   |   |   |   |   |   |   |   |   |   |   |   |   |
| Victoria/361/11                 | D                      |    |    |    | H  | K  |    |    |    |    | R  | G   | D   | E   |     |     |     |     |     |     | S   | I   | A   | I   | V   | V   | A   | S   |     |     |     | I   | H   | L   |     |     |     |     |     |     |     |     | N   | G   | G   |     |     | T   | T   | E   | S   |     | S   | V   | R   | T   |     |   |   |   |   |   |   |   |   |   |   |   |   |   |   |   |   |
| Texas/50/12                     | D                      |    |    |    | H  | K  |    |    |    |    | R  |     | E   |     |     |     |     |     |     |     | S   | I   | A   | I   | V   | V   | A   | S   |     |     |     | I   | H   | L   |     |     |     |     |     |     |     |     |     | N   | G   |     |     |     | T   | T   | E   | S   |     | S   | V   | R   | T   |   |   |   |   |   |   |   |   |   |   |   |   |   |   |   |   |
| Switzerland/9715293/13          | D                      |    |    |    | H  | K  |    |    |    |    | R  |     | E   |     |     |     |     |     |     |     | S   | I   | A   | I   | V   | G   | V   | A   | S   |     |     |     | I   | H   | L   |     |     |     |     |     |     |     |     | N   | G   | G   |     |     | T   | T   | E   | S   |     | S   | V   | R   | T   |   |   |   |   |   |   |   |   |   |   |   |   |   |   |   |   |
| Hong Kong/4801/14               | D                      |    |    |    | H  | K  |    |    |    |    | R  |     | E   |     |     |     |     |     |     |     | S   | I   | A   | I   | V   | V   | A   | S   |     |     |     | I   | H   | L   |     |     |     |     |     |     |     |     |     | N   | G   | G   |     |     | T   | T   | E   | S   |     | S   | V   | R   | T   |   |   |   |   |   |   |   |   |   |   |   |   |   |   |   |   |
| A/Singapore/INFIMH-16-0019/2016 | D                      |    |    |    | H  | K  |    |    |    |    | R  |     | E   |     |     |     |     |     |     |     | S   | I   | A   | I   | V   | V   | A   | S   |     |     |     | I   | H   | L   |     |     |     |     |     |     |     |     |     |     | N   | G   | G   |     |     | T   | T   | E   | S   |     |     | V   | R   |   |   |   |   |   |   |   |   |   |   |   |   |   |   |   |   |
| Taiwan/S0027/99                 | D                      |    |    |    |    | K  |    |    |    |    | R  |     | E   |     |     |     |     |     |     |     | A   | I   | V   | V   | S   |     |     |     | H   | L   |     |     |     |     |     |     |     |     |     |     |     |     |     | N   | G   | G   |     |     | T   | E   | S   | V   |     |     | V   | R   | T   |   |   |   |   |   |   |   |   |   |   |   |   |   |   |   |   |
| Taiwan/S283/99                  | D                      |    |    |    |    | K  |    |    |    |    | R  |     | E   |     |     |     |     |     |     |     | A   | I   | V   | V   | S   |     |     |     | H   | L   |     |     |     |     |     |     |     |     |     |     |     |     |     |     | N   | G   | G   |     |     | T   | E   | S   | V   |     |     | V   | R   | T |   |   |   |   |   |   |   |   |   |   |   |   |   |   |   |
| Taiwan/S394/99                  | D                      |    |    |    |    | K  | R  |    |    |    | R  |     | E   |     |     |     |     |     |     |     |     | I   | V   | V   | S   |     |     |     | H   | L   |     |     |     |     |     |     |     |     |     |     |     |     |     |     |     | N   | G   | G   |     |     | T   | E   | S   | V   |     |     | V   | R | T |   |   |   |   |   |   |   |   |   |   |   |   |   |   |
| Taiwan/N720/99                  | D                      |    |    |    |    | K  |    |    |    |    | R  |     | E   |     |     |     |     |     |     |     | A   | I   | V   | V   | S   |     |     |     | H   | L   |     |     |     |     |     |     |     |     |     |     |     |     |     |     |     | N   | G   | G   |     |     | T   | E   | S   | V   |     |     | V   | R | T |   |   |   |   |   |   |   |   |   |   |   |   |   |   |
| Taiwan/N1208/99                 | D                      |    |    |    |    | K  |    |    |    |    | R  |     | E   |     |     |     |     |     |     |     | A   | I   | V   | V   | S   |     |     |     | H   | L   |     |     |     |     |     |     |     |     |     |     |     |     |     |     |     | N   | G   | G   |     |     | T   | E   | S   | V   |     |     | V   | R | T |   |   |   |   |   |   |   |   |   |   |   |   |   |   |
| Taiwan/N727/00                  | D                      |    |    |    |    | K  | R  |    |    |    | R  |     | E   | G   |     |     |     |     |     |     |     | I   | V   | V   | S   |     |     |     | H   | L   |     |     |     |     |     |     |     |     |     |     |     |     |     |     |     |     | N   | G   | G   |     |     | T   | E   | S   | V   |     |     | V | R | T |   |   |   |   |   |   |   |   |   |   |   |   |   |
| Taiwan/M822/00                  | D                      |    |    |    |    | K  |    |    |    |    | R  |     | E   |     |     |     |     |     |     |     | A   | I   | V   | V   | S   |     |     |     | H   | L   |     |     |     |     |     |     |     |     |     |     |     |     |     |     |     |     | N   | G   | G   |     |     | T   | T   | E   | S   |     |     | V | R | T |   |   |   |   |   |   |   |   |   |   |   |   |   |
| Taiwan/N402/01                  | D                      |    |    |    |    | K  |    |    |    |    | T  | R   |     | E   |     |     |     |     |     |     |     | A   | I   | V   | V   | S   |     |     |     | H   | L   |     |     |     |     |     |     |     |     |     |     |     |     |     |     |     | N   | G   | G   |     |     | T   | T   | E   | S   |     |     | V | R | T |   |   |   |   |   |   |   |   |   |   |   |   |   |
| Taiwan/N225/01                  | D                      |    |    |    |    | K  |    |    |    |    | R  |     | E   |     |     |     |     |     |     |     | A   | I   | V   | V   | S   |     |     |     | H   | L   |     |     |     |     |     |     |     |     |     |     |     |     |     |     |     |     |     | I   |     | N   | G   | G   | I   |     | T   | T   | E   | S |   |   | V | R | T |   |   |   |   |   |   |   |   |   |   |
| Taiwan/N2555/01                 | D                      |    |    |    |    | K  | R  | D  |    |    | R  |     | E   |     |     |     |     |     |     |     | I   |     | I   | V   | V   | S   |     |     |     | H   | L   |     |     |     |     |     |     |     |     |     |     |     |     |     |     |     |     |     | Q   |     | N   | G   | G   |     |     | T   | E   | S | V |   |   | V | R | T |   |   |   |   |   |   |   |   |   |
| Taiwan/S89/02                   | D                      | S  |    |    |    | K  | R  |    |    |    | R  | E   |     |     |     |     |     |     |     |     | A   | I   |     | V   | S   |     |     |     | H   | L   |     |     |     |     |     |     |     |     |     |     |     |     |     |     |     |     |     |     |     | N   | G   | G   |     |     | T   | E   | S   | V |   |   | V | R | T | E |   |   |   |   |   |   |   |   |   |
| Taiwan/N1349/02                 | D                      | S  |    |    |    | K  | R  |    |    |    | R  | E   |     |     |     |     |     |     |     |     | A   | I   |     | V   | S   |     |     |     | H   | L   |     |     |     |     |     |     |     |     |     |     |     |     |     |     |     |     |     |     |     |     |     | N   | G   | G   |     |     | T   | E | S | V |   |   | V | R | T | E |   |   |   |   |   |   |   |
| Taiwan/N2205/02                 | D                      | S  |    |    |    | K  | R  |    |    |    | R  | E   |     |     |     |     |     |     |     |     | A   | I   |     | V   | S   |     |     |     | H   | L   |     |     |     |     |     |     |     |     |     |     |     |     |     |     |     |     |     |     |     |     |     |     |     | N   | G   | G   |     |   | T | E | S | V |   |   | V | R | T | E |   |   |   |   |   |
| Taiwan/N1811/02                 | D                      | S  |    |    |    | K  | R  |    |    |    | R  | E   |     |     |     |     |     |     |     |     | A   | I   |     | V   | S   |     |     |     | H   | L   |     |     |     |     |     |     |     |     |     |     |     |     |     |     |     |     |     |     |     |     |     |     |     |     | N   | G   | G   |   |   | T | E | S | V |   |   | V | R | T | E |   |   |   |   |
| Taiwan/3446/02                  | D                      | S  |    |    |    | K  | R  |    |    |    | R  | E   |     |     |     |     |     |     |     |     | A   | I   |     | V   | S   |     |     |     | H   | L   |     |     |     |     |     |     |     |     |     |     |     |     |     |     |     |     |     |     |     |     |     |     |     |     |     | N   | G   | G |   |   | T | E | S | V |   | S | V | R | T | E |   |   |   |
| Taiwan/N4069/02                 | D                      |    |    |    |    | K  |    |    |    |    | R  |     | E   |     |     |     |     |     |     |     | I   | A   | I   | V   | V   | S   |     |     |     | H   | L   |     |     |     |     |     |     |     |     |     |     |     |     |     |     |     |     |     |     |     |     |     |     |     | N   | G   | G   |   |   | T | T | E | S |   |   | V | R | T |   |   |   |   |   |
| Taiwan/M190/02                  | D                      |    |    |    |    | K  |    |    |    |    | S  | R   |     | E   |     |     |     |     |     |     | I   | A   | I   | V   | V   | S   |     |     |     | H   | L   |     |     |     |     |     |     |     |     |     |     |     |     |     |     |     |     |     |     |     |     |     |     |     |     | N   | G   | G |   |   | T | T | E | S |   |   | V | R | T |   |   |   |   |
| Taiwan/M63/02                   | D                      |    | R  |    |    | K  | R  |    |    |    | R  |     | E   |     |     |     |     |     |     |     |     | I   | V   | V   | S   |     |     |     | H   | L   |     |     |     |     |     |     |     |     |     |     |     |     |     |     |     |     |     |     |     |     |     |     |     |     |     |     |     | N | G | G |   |   | T | D | E | S | V |   |   | V | R | T | E |



**Additional file 2 (Continued). Amino acid substitutions in NP protein of H3N2 viruses**

|                  | NP amino acid position |    |    |    |    |    |    |    |    |    |    |     |     |     |     |     |     |     |     |     |     |     |     |     |     |     |     |     |     |     |     |     |     |     |     |     |     |     |     |     |     |     |     |     |     |     |     |     |     |     |     |     |     |     |     |     |     |  |   |
|------------------|------------------------|----|----|----|----|----|----|----|----|----|----|-----|-----|-----|-----|-----|-----|-----|-----|-----|-----|-----|-----|-----|-----|-----|-----|-----|-----|-----|-----|-----|-----|-----|-----|-----|-----|-----|-----|-----|-----|-----|-----|-----|-----|-----|-----|-----|-----|-----|-----|-----|-----|-----|-----|-----|-----|--|---|
|                  | 18                     | 27 | 31 | 50 | 52 | 65 | 77 | 81 | 85 | 95 | 98 | 101 | 103 | 114 | 127 | 128 | 131 | 136 | 146 | 186 | 197 | 217 | 239 | 280 | 286 | 287 | 301 | 312 | 334 | 343 | 350 | 353 | 354 | 360 | 363 | 371 | 373 | 375 | 377 | 384 | 396 | 400 | 406 | 411 | 417 | 421 | 423 | 425 | 430 | 450 | 452 | 456 | 459 | 472 | 480 | 481 | 482 |  |   |
| Hong Kong/1/68   | E                      | A  | K  | S  | Y  | R  | K  | E  | A  | P  | K  | D   | K   | E   | D   | D   | A   | M   | T   | V   | I   | S   | M   | V   | A   | S   | I   | V   | N   | V   | T   | S   | P   | T   | V   | M   | A   | E   | S   | R   | T   | R   | I   | A   | N   | D   | P   | I   | T   | G   | K   | M   | Q   | A   | D   | M   | S   |  |   |
| Taiwan/N864/07   | D                      |    |    | H  | K  |    |    |    |    |    | R  |     |     | E   |     |     | I   | A   | I   | V   |     |     | V   | A   | S   |     |     | I   | H   | L   |     |     |     |     |     |     | N   | G   | G   |     |     | T   | T   | E   | S   |     |     |     |     |     |     | V   | R   |     |     |     |     |  |   |
| Taiwan/N1811/07  | D                      |    |    | H  | K  |    |    |    |    |    | R  |     |     | E   |     |     | S   | I   | A   | I   | V   |     |     | V   | A   | S   |     |     | I   | H   | L   |     |     |     |     |     |     | N   | G   | G   |     |     | T   | T   | E   | S   |     |     |     |     |     | V   | R   | T   |     |     | T   |  |   |
| Taiwan/M50/08    | D                      |    |    | H  | K  |    |    |    |    |    | R  |     |     | E   |     |     | S   | I   | A   | I   | V   |     |     | V   | A   | S   |     |     | I   | H   | L   |     |     |     |     |     |     | N   | G   | G   |     |     | T   | T   | E   | S   |     |     |     |     |     | V   | R   | T   |     |     | T   |  |   |
| Taiwan/M58/08    | D                      |    |    | H  | K  |    |    |    |    |    | R  |     |     | E   |     |     | S   | I   | A   | I   | V   |     |     | V   | A   | S   |     |     | I   | H   | L   |     |     |     |     |     |     | N   | G   | G   |     |     | T   | T   | E   | S   |     |     |     |     |     | V   | R   | T   |     |     |     |  |   |
| Taiwan/N4547/08  | D                      |    |    | H  | K  |    |    |    |    |    | R  |     |     | E   |     |     | S   | I   | A   | I   | V   |     |     | V   | A   | S   |     |     | I   | H   | L   |     |     |     |     |     |     | N   | G   | G   |     |     | T   | T   | E   | S   |     |     |     |     |     | V   | R   | T   |     |     |     |  |   |
| Taiwan/M1717/08  | D                      |    |    | H  | K  |    |    |    |    |    | R  |     |     | E   |     |     | S   | I   | A   | I   | V   |     |     | V   | A   | S   |     |     | I   | H   | L   |     |     |     |     |     |     | N   | G   | G   |     |     | T   | T   | E   | S   |     |     |     |     |     | V   | R   | T   |     |     |     |  |   |
| Taiwan/M73/09    | D                      |    |    | H  | K  |    |    |    |    |    | R  |     |     | E   |     |     | S   | I   | A   | I   | V   |     |     | V   | A   | S   |     |     | I   | H   | L   |     |     |     |     |     |     | N   | G   | G   |     |     | T   | T   | E   | S   |     |     |     |     |     | V   | R   | T   |     |     |     |  |   |
| Taiwan/N665/09   | D                      |    |    | H  | K  |    |    |    |    |    | R  |     |     | E   |     |     | S   | I   | A   | I   | V   |     |     | V   | A   | S   |     |     | I   | H   | L   |     |     |     |     |     |     | N   | G   | G   |     |     | T   | T   | E   | S   |     |     |     |     |     | V   | R   | T   |     |     |     |  |   |
| Taiwan/M1157/09  | D                      |    |    | H  | K  |    |    |    |    |    | R  |     |     | E   |     |     | S   | I   | A   | I   | V   |     |     | V   | A   | S   |     |     | I   | H   | L   |     |     |     |     |     |     | N   | G   | G   |     |     | T   | T   | E   | S   |     | S   |     |     |     | V   | R   | T   |     |     |     |  |   |
| Taiwan/M1735/10  | D                      |    |    | H  | K  |    |    |    |    |    | R  |     |     | E   |     |     | S   | I   | A   | I   | V   |     |     | V   | A   | S   |     |     | I   | H   | L   |     |     |     |     |     |     | N   | G   | G   |     |     | T   | T   | E   | S   |     |     |     |     |     | V   | R   | T   |     |     |     |  |   |
| Taiwan/N13327/10 | D                      |    |    | H  | K  |    |    |    |    |    | R  |     |     | E   |     |     | S   | I   | A   | I   | V   |     |     | V   | A   | S   |     |     | I   | H   | L   |     |     |     |     |     |     | N   | G   | G   |     |     | T   | T   | E   | S   |     |     |     |     |     | V   | R   | T   |     |     |     |  | N |
| Taiwan/M1074/10  | D                      |    |    | H  | K  |    |    |    |    |    | R  |     |     | E   |     |     | S   | I   | A   | I   | V   |     |     | V   | A   | S   |     |     | I   | H   | L   |     |     |     |     |     |     | N   | G   | G   |     |     | T   | T   | E   | S   |     |     |     |     |     | V   | R   | T   |     |     |     |  |   |
| Taiwan/M1815/10  | D                      |    |    | H  | K  |    | S  |    |    |    | R  |     |     | E   |     |     | S   | I   | A   | I   | V   |     |     | V   | A   | S   |     |     | I   | H   | L   |     |     |     |     |     |     | N   | G   | G   |     |     | T   | T   | E   | S   |     |     |     |     |     | V   | R   | T   |     |     |     |  |   |
| Taiwan/M36/11    | D                      |    |    | H  | K  |    |    |    |    |    | R  |     |     | E   |     |     | S   | I   | A   | I   | V   |     |     | V   | A   | S   |     |     | I   | H   | L   |     |     |     |     |     |     | N   | G   | G   |     |     | T   | T   | E   | S   |     |     |     |     |     | V   | R   | T   |     |     |     |  |   |
| Taiwan/N658/11   | D                      |    |    | H  | K  |    |    |    |    |    | R  |     |     | E   |     |     | S   | I   | A   | I   | V   |     |     | V   | A   | S   |     |     | I   | H   | L   |     |     |     |     |     |     | N   | G   | G   |     |     | T   | T   | E   | S   |     |     |     |     |     | V   | R   | T   |     |     |     |  | N |
| Taiwan/N15927/12 | D                      |    |    | H  | K  |    |    |    |    |    | R  |     |     | E   |     |     | S   | I   | A   | I   | V   |     |     | V   | A   | S   |     |     | I   | H   | L   |     |     |     |     |     |     | N   | G   | G   |     |     | T   | T   | E   | S   |     |     |     |     |     | V   | R   | T   |     |     |     |  |   |
| Taiwan/M651/12   | D                      |    |    | H  | K  |    |    |    |    |    | R  |     |     | E   |     |     | S   | I   | A   | I   | V   |     |     | V   | A   | S   |     |     | I   | H   | L   |     |     |     |     |     |     | N   | G   | G   |     |     | T   | T   | E   | S   |     |     |     |     |     | V   | R   | T   |     |     |     |  |   |
| Taiwan/M1188/12  | D                      |    |    | H  | K  |    |    |    |    |    | R  |     |     | E   |     |     | S   | I   | A   | I   | V   |     |     | V   | A   | S   |     |     | I   | H   | L   |     |     |     |     | S   |     | N   | G   | G   |     |     | T   | T   | E   | S   |     |     |     |     |     | V   | R   | T   |     |     |     |  |   |
| Taiwan/M725/13   | D                      |    |    | H  | K  |    |    |    |    |    | R  |     |     | E   |     |     | S   | I   | A   | I   | V   |     |     | V   | A   | S   |     |     | I   | H   | L   |     |     |     |     |     |     | N   | G   | G   |     |     | T   | T   | E   | S   |     |     |     |     |     | V   | R   | T   |     |     |     |  |   |
| Taiwan/M807/13   | D                      |    |    | H  | K  |    |    |    |    |    | R  |     |     | E   |     |     | S   | I   | A   | I   | V   |     |     | V   | A   | S   |     |     | I   | H   | L   |     |     |     |     |     |     | N   | G   | G   |     |     | T   | T   | E   | S   |     |     |     |     |     | V   | R   | T   |     |     |     |  |   |
| Taiwan/M977/13   | D                      |    |    | H  | K  |    |    |    |    |    | R  |     |     | E   |     |     | S   | I   | A   | I   | V   |     |     | V   | A   | S   |     |     | I   | H   | L   |     |     |     |     |     |     | N   | G   | G   |     |     | T   | T   | E   | S   |     |     |     |     |     | V   | R   | T   |     |     |     |  |   |
| Taiwan/M593/13   | D                      |    |    | H  | K  |    |    |    |    |    | R  |     |     | E   |     |     | S   | I   | A   | I   | V   |     |     | V   | A   | S   |     |     | I   | H   | L   |     |     |     |     |     |     | N   | G   | G   |     |     | T   | T   | E   | S   |     |     |     |     |     | V   | R   | T   |     |     |     |  |   |
| Taiwan/M216/14   | D                      |    |    | H  | K  |    |    |    |    |    | R  |     |     | E   |     |     | S   | I   | A   | I   | V   |     |     | V   | A   | S   |     |     | I   | H   | L   |     |     |     |     |     |     | N   | G   | G   |     |     | T   | T   | E   | S   |     |     |     |     |     | V   | R   | T   |     |     |     |  |   |
| Taiwan/M133/14   | D                      |    |    | H  | K  |    |    |    |    |    | R  |     |     | E   |     |     | S   | I   | A   | I   | V   |     |     | V   | A   | S   |     |     | I   | H   | L   |     |     |     |     |     |     | N   | G   | G   |     | K   | T   | T   | E   | S   |     |     |     |     |     | V   | R   | T   |     |     |     |  |   |
| Taiwan/M202/15   | D                      |    |    | H  | K  |    |    |    |    |    | R  |     |     | E   |     |     | S   | I   | A   | I   | V   | G   |     | V   | A   | S   |     |     | I   | H   | L   |     |     |     |     |     |     | N   | G   | G   |     |     | T   | T   | E   | S   |     |     |     |     |     | V   | R   | T   |     |     |     |  |   |
| Taiwan/M513/15   | D                      |    |    | H  | K  |    |    |    |    |    | R  |     |     | E   |     |     | S   | I   | A   | I   | V   |     |     | V   | A   | S   |     |     | I   | H   | L   |     |     |     |     |     |     | N   | G   | G   |     |     | T   | T   | E   | S   |     |     |     |     |     | V   | R   | T   |     |     |     |  |   |
| Taiwan/M1386/15  | D                      |    |    | H  | K  |    |    |    |    |    | R  |     |     | E   |     |     | S   | I   | A   | I   | V   |     |     | V   | A   | S   |     |     | I   | H   | L   |     |     |     |     |     |     | N   | G   | G   |     |     | T   | T   | E   | S   |     |     |     |     |     | V   | R   |     |     |     |     |  |   |
| Taiwan/28588/16  | D                      |    |    | H  | K  |    |    |    |    |    | R  |     |     | E   |     |     | S   | I   | A   | I   | V   |     |     | V   | A   | S   |     |     | I   | H   | L   |     |     |     |     |     |     | N   | G   | G   |     |     | T   | T   | E   | S   |     |     |     |     |     | V   | R   |     |     |     |     |  |   |
| Taiwan/M50671/16 | D                      |    |    | H  | K  |    |    |    |    |    | R  |     |     | E   |     |     | S   | I   | A   | I   | V   |     |     | V   | A   | S   |     |     | I   | H   | L   |     |     |     |     |     |     | N   | G   | G   |     |     | T   | T   | E   | S   |     |     |     |     |     | V   | R   |     |     |     |     |  |   |
| Taiwan/M50214/17 | D                      |    |    | H  | K  |    |    |    |    |    | R  |     |     | E   |     |     | S   | I   | A   | I   | V   |     |     | V   | A   | S   |     |     | I   | H   | L   |     |     |     |     |     |     | N   | G   | G   |     |     | T   | T   | E   | S   |     |     |     |     |     | V   | R   |     |     |     |     |  |   |
| Taiwan/M50339/17 | D                      |    |    | H  | K  |    |    |    |    |    | R  |     |     | E   |     |     | S   | I   | A   | I   | V   |     |     | V   | A   | S   |     |     | I   | H   | L   |     |     |     |     |     |     | N   | G   | G   |     |     | T   | T   | E   | S   |     |     |     |     |     | V   | R   |     |     |     |     |  |   |
